# Supplementary material for: ESCRT-III is necessary for the integrity of the nuclear envelope in micronuclei but is aberrant at ruptured micronuclear envelopes generating damage
Source: PubMed Central journal article supplement (PMC6465242; doi:10.1038/s41389-019-0136-0), 2019-04-15
Supplement: 41389_2019_136_MOESM1_ESM.pdf [file 41389_2019_136_MOESM1_ESM.pdf]

1 Supplementary figure and legends

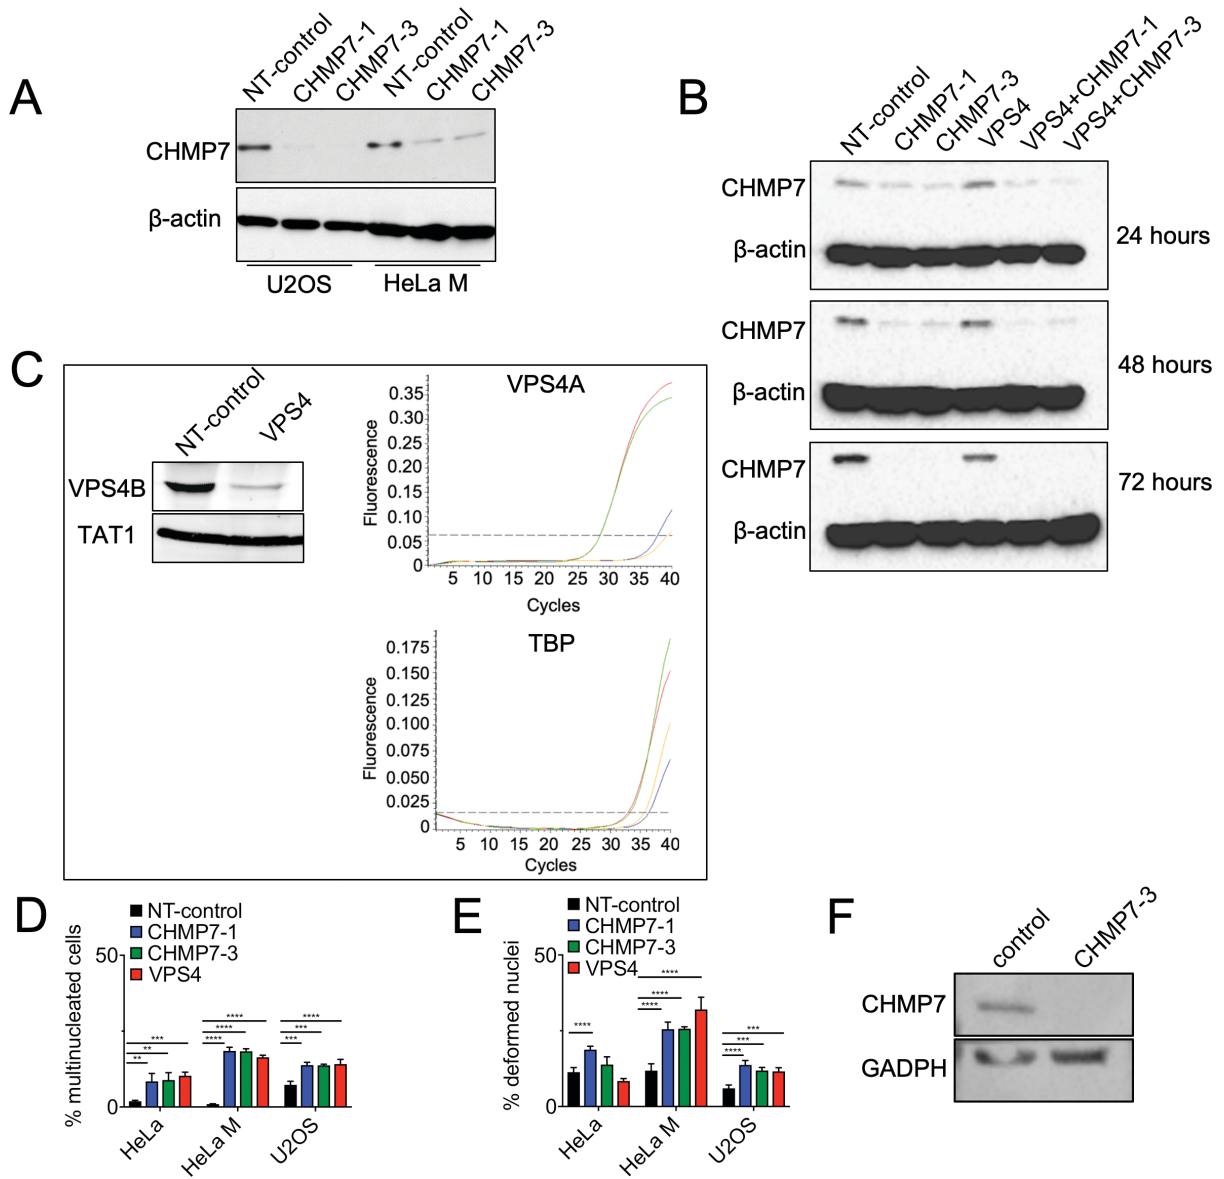

2

3 Supplementary Figure 1. RNAi knockdown efficiency and nuclear effects. (A)

4 Western blot showing knockdown of CHMP7 in U2OS cells by the two CHMP7

5 sRNAi sequences used in this study. U2OS cells were treated with 10 nM sRNAi for

6 48 hours. The samples were blotted using the mouse-derived anti-CHMP7 antibody.

7 (B) Levels of CHMP7 protein in sRNAi knockdown of CHMP7 and VPS4 individually

8 and in combination in HeLa cells at 24, 48 and 72 hours post-transfection. The  
9 samples were blotted with the mouse-derived anti-CHMP7 antibody. (C) HeLa cells  
10 were treated with 5 nM sRNAi of each VPS4A and B oligos for 48 hours. Left:  
11 Western blot showing knockdown of VPS4B. Right: amplification curves from qPCR  
12 showing depletion of VPS4A in comparison to the housekeeping gene TBP as an  
13 internal standard (VPS4A primer top, TBP primer bottom; 2 independent runs.  
14 Red/green lines are for control KD, orange/blue lines are for VPS4A/B KD). The  
15 VPS4A KD efficiency is ~98%. (D) Quantification of multinucleated cells and  
16 deformed nuclei phenotypes (E) generated upon treatment of HeLa cells with the  
17 indicated sRNAi (a minimum of 500 cells were scored per condition). Results were  
18 analyzed using a two-way ANOVA with Dunnett's post hoc test. Averages and SEM  
19 (N=3) are shown. (F) Western blot showing knockdown of CHMP7 in h-TERT  
20 fibroblasts after treatment with 20 nM CHMP7-3 sRNAi for 48 hours. Control cells  
21 were transfected with sRNAi GLi2 20 nM. In all panels, NT-control is non-targeting  
22 siRNA. VPS4 represent co-depletion of VPS4A and B.

23

24

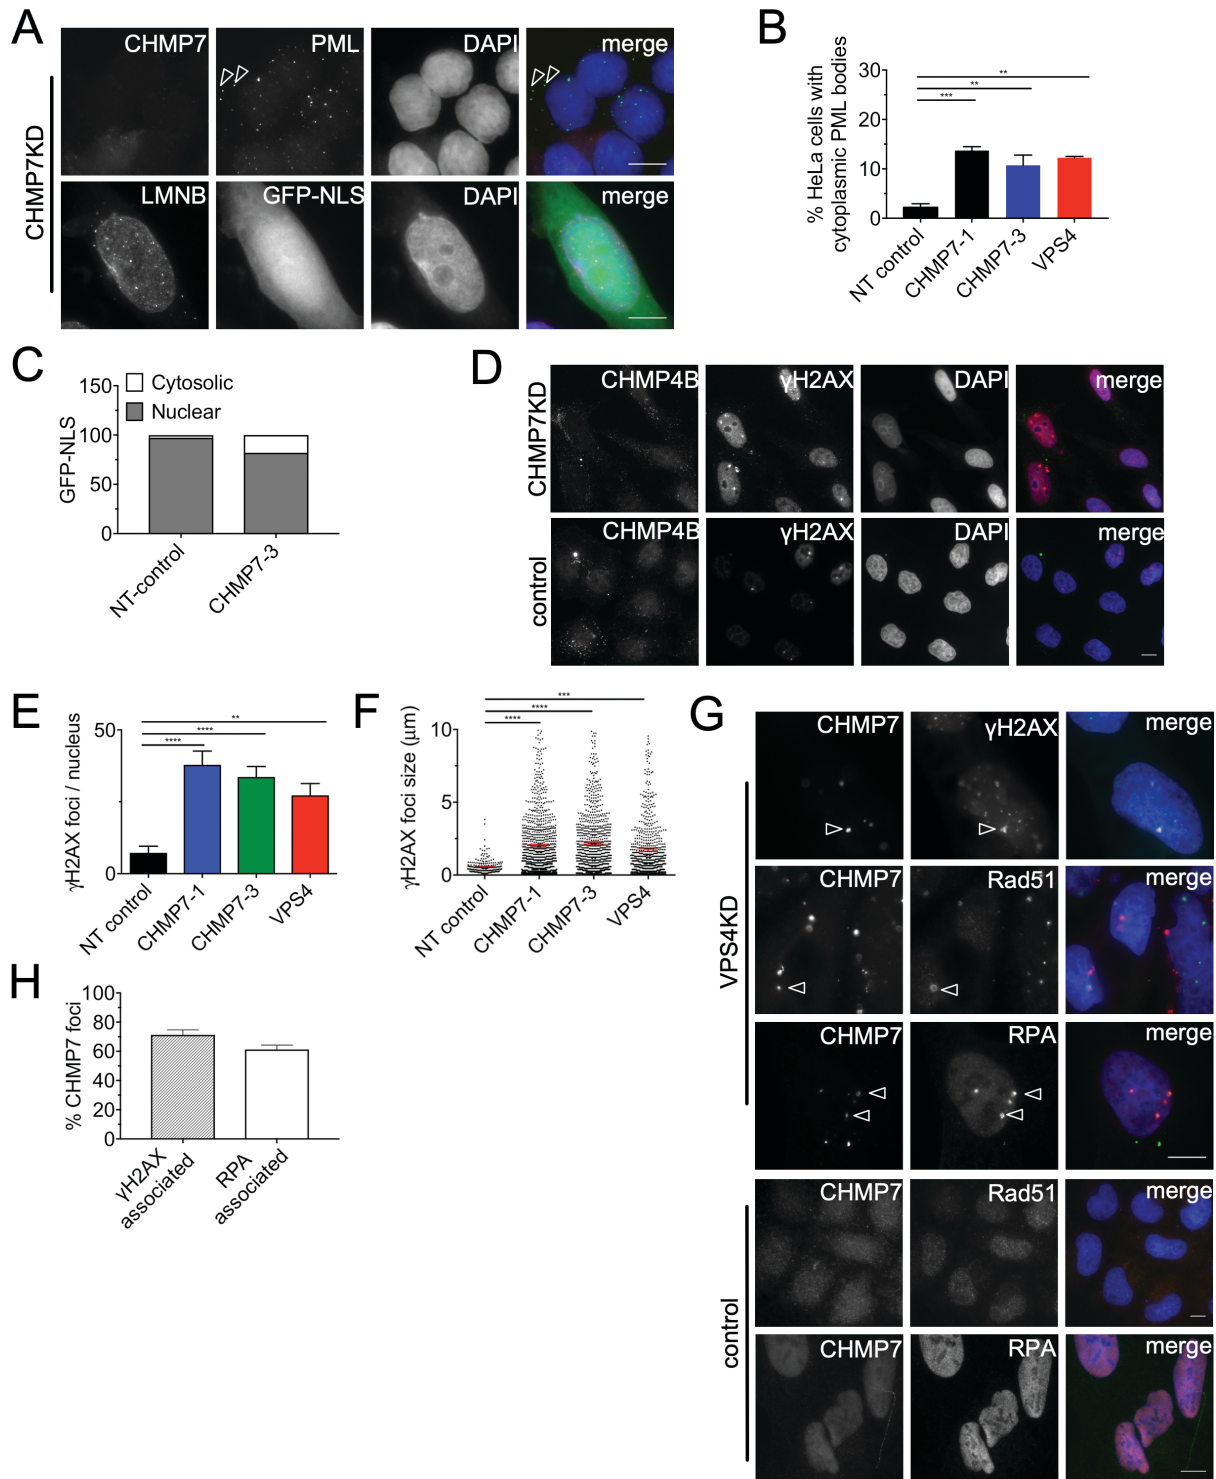

25

26 **Supplementary Figure 2. ESCRT-III impairment predispose cells to DNA damage.**

27 (A) Cytoplasmic PML bodies in HeLa cells (arrowheads indicating cytoplasmic PML)

28 and GFP-NLS localization in h-TERT immortalised human fibroblast after treatment

29 with CHMP7 sRNAi for 48 hours. (B) Quantification of HeLa cells with cytoplasmic

30 PML bodies across NT control, CHMP7 and VPS4 sRNAi transfection (minimum of  
31 550 cells scored per condition). Results were analysed using a one-way ANOVA with  
32 Dunnett's post hoc test. (C) Quantification of GFP-NLS retention judged visually by  
33 the gain in cytoplasmic signal in h-TERT fibroblast treated for 24 hours with the  
34 indicated sRNAi and then transfected with GFP-NLS and fixed at 48 hours post  
35 transfection (between 64 and 148 cells scored). Averages of N=2 biological repeats  
36 are shown. (D) Nuclear  $\gamma$ H2AX foci in HeLa cells, after treatment with control or  
37 CHMP7 sRNAi for 48 hours. (E) Quantification of the number of  $\gamma$ H2AX foci in the  
38 nucleus in HeLa cells treated with the indicated sRNAi for 48 hours (minimum of 30  
39 cells per conditions). (F) Diameter of  $\gamma$ H2AX foci (NT-control – 218 foci; CHMP7-1 –  
40 1587 foci; CHMP7-3 – 1076 foci; VPS4 – 1076 foci) in HeLa cells treated with the  
41 indicated sRNAi for 48 hours. Results were analysed using a one-way ANOVA with  
42 Dunnett's post hoc test. (G) CHMP7 foci at the nuclear periphery co-occur with  
43 markers of DNA damage and repair. HeLaM cells transfected with control or VPS4  
44 sRNAi for 48 hours, co-stained to show CHMP7 and either  $\gamma$ H2AX, Rad51 or ssDNA  
45 detected using RPA34 (bottom panel, U2OS cells). (H) CHMP7 foci were scored for  
46 co-occurrence with  $\gamma$ H2AX or RPA in HeLa cells transfected with VPS4 sRNAi for 48  
47 hours (a minimum of 300 foci were scored for each condition). Averages and  
48 standard error of three independent repeats are shown, except for (C). Scale bars  
49 represent 10  $\mu$ m.

50



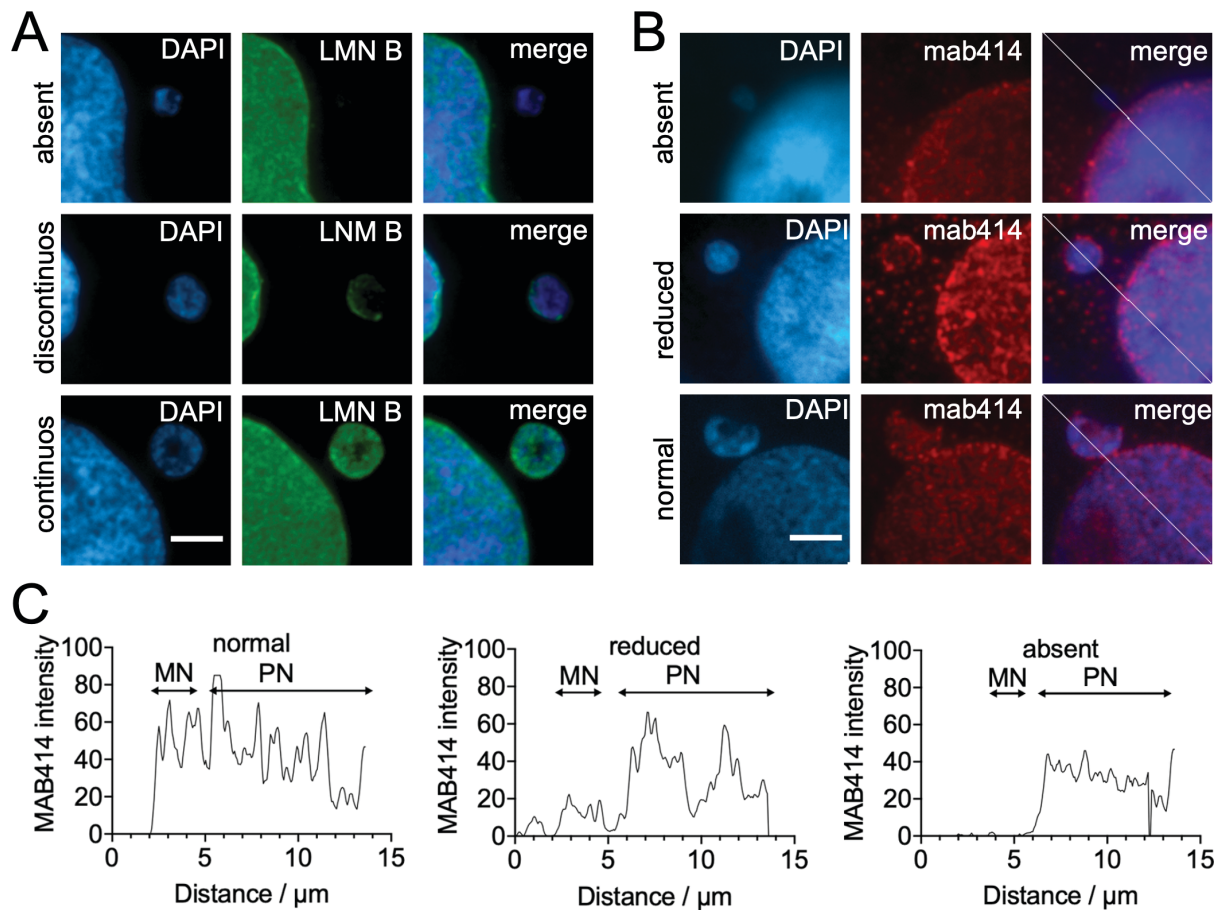

51

52 **Supplementary Figure 3.** (A) Categories of micronuclei where the nuclear lamina is

53 intact (continuous), broken (discontinuous) or entirely absent. Scale bar 3  $\mu\text{m}$ . (B)

54 Categories of micronuclei where the NPCs density by visual inspection is present at

55 normal levels, at reduced levels or are entirely absent. Scale bar represents 3  $\mu\text{m}$ .

56 (C) Relative pixel intensity of the MAB414 signal at the micronucleus (MN) and

57 primary nucleus (PN).

58

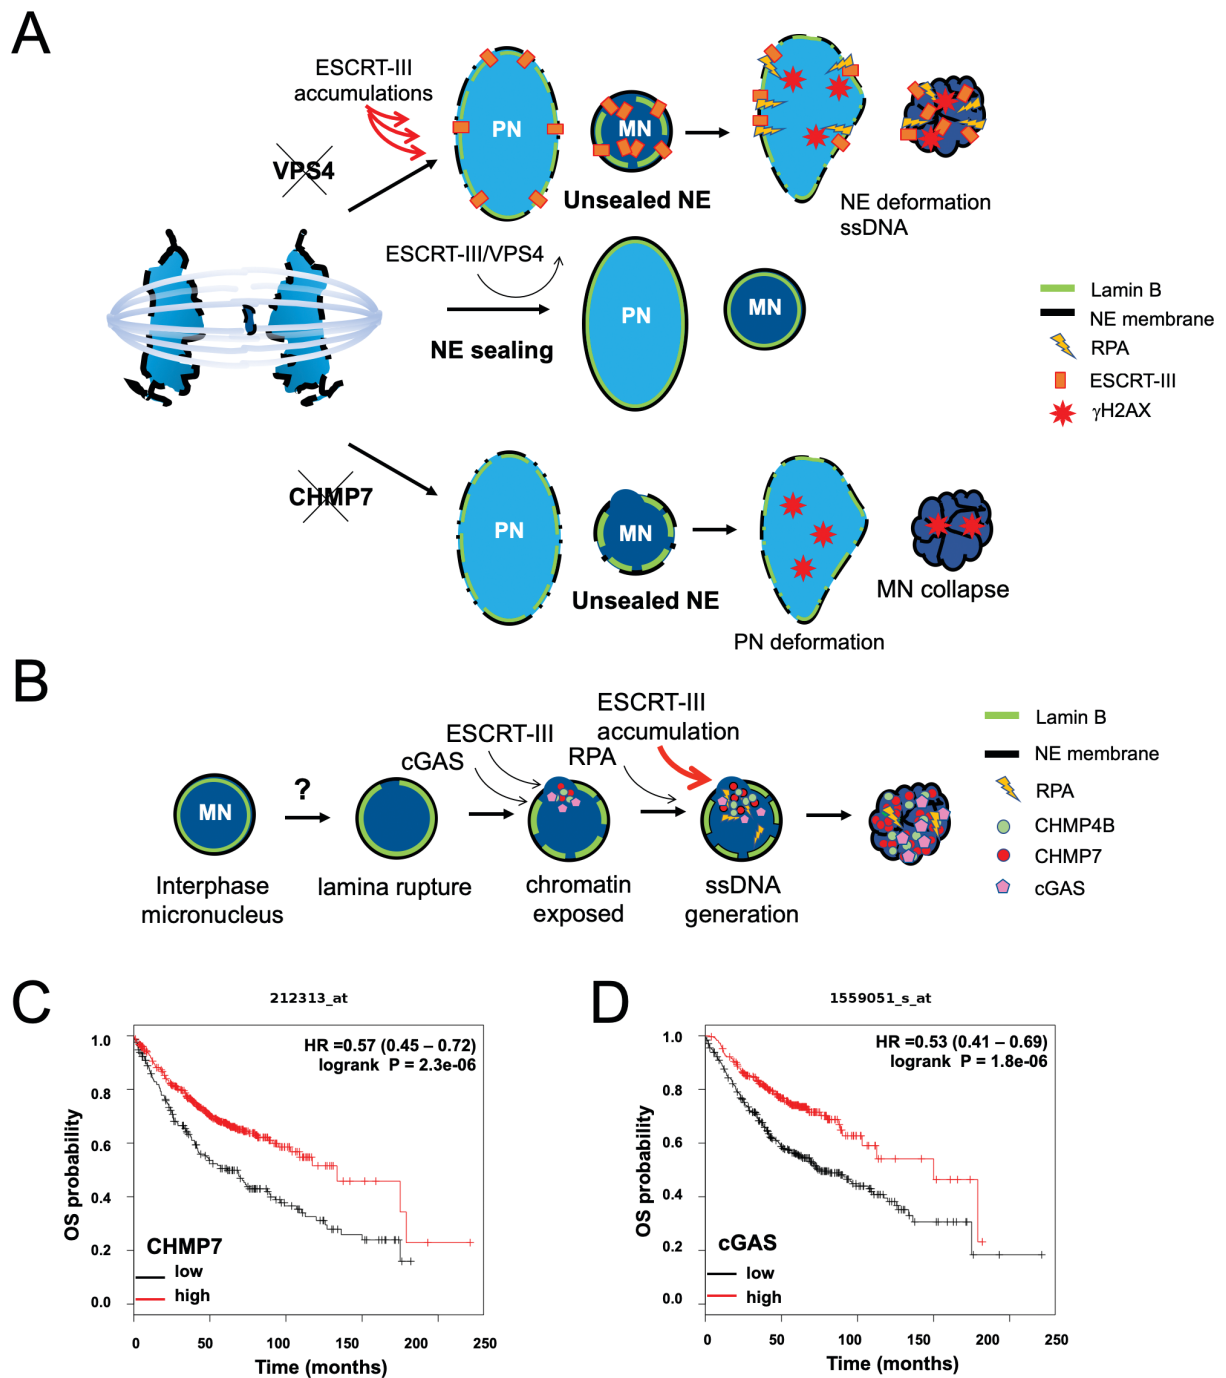

59

60 Supplementary Figure 4. (A) Perturbation of ESCRT-III activity increases the  
 61 population of micronuclei with disrupted nuclear envelope (NE). ESCRT-III and VPS4  
 62 recruitment and activity at mitotic exit proceeds normally at the primary nucleus  
 63 (PN) and micronucleus (MN). This pathway of ESCRT-III recruitment is VPS4-  
 64 dependent. In the absence of VPS4, ESCRT-III activity is unregulated, resulting in

65 excess ESCRT-III recruitment with consequent membrane deformation and DNA  
66 damage. In the absence of CHMP7, ESCRT-III is not recruited at NE gaps, resulting  
67 in the generation of PNs and MNs with weak and leaky NE. (B) Ruptured  
68 micronuclei (MN) in interphase cells contain accumulated ESCRT-III. These  
69 micronuclei develop collapsed envelopes, accumulate single-stranded DNA and  
70 expose genomic material to the cytosol, with the build-up of ESCRT-III exacerbating  
71 damage. This pathway of ESCRT-III accumulation is VPS4-independent. (C-D)  
72 Overall survival curves of lung adenocarcinoma analyzed for CHMP7 (C) and cGAS  
73 (D) expression using KM plotter ([www.kmplot.com](http://www.kmplot.com))<sup>1</sup> using an auto-select cutoff. For  
74 CHMP7: 720 patients; probe=212313\_at; logrank P=2.3e-6 (squamous cell  
75 carcinoma not significant). For cGAS: 720 patients; probe=1559051; logrank  
76 P=1.8e-6 (squamous cell carcinoma not significant).

77

#### 78 **Additional references**

79 1 Györffy B, Lanczky A, Eklund AC, Denkert C, Budczies J, Li Q *et al.* An online  
80 survival analysis tool to rapidly assess the effect of 22,277 genes on breast  
81 cancer prognosis using microarray data of 1,809 patients. *Breast Cancer Res*  
82 *Treat* 2010; **123**: 725–731.

83

84

## Supplementary tables

Supplementary table 1

| <b>sRNAi target</b>    | <b>sRNAi oligonucleotide sequences</b>                       |
|------------------------|--------------------------------------------------------------|
| <b>NT-control</b>      | ON-TARGETplus non-targeting control<br>sRNAi (#1; Dharmacon) |
| <b>CHMP7-1*</b>        | GGGAGAAGAUUGUGAAGUU                                          |
| <b>CHMP7-3</b>         | GGAGGUGUAUCGUCUGUAU                                          |
| <b>VPS4A oligo 5**</b> | CCACAAACAUCCCAUGGGU                                          |
| <b>VPS4A oligo 6**</b> | CCGAGAAGCUGAAGGAUUA                                          |
| <b>VPS4B oligo 5**</b> | GGGCAAAGUGUACAGAAUA                                          |
| <b>VPS4B oligo 6**</b> | CGAUAGAUCUGGCUAGCAA                                          |

\* from Morita et al PNAS 2010

\*\* from Stefani et al Current Biology 2011

Supplementary table 2

| Primary antibodies          |                 |                      |             |          |        |
|-----------------------------|-----------------|----------------------|-------------|----------|--------|
| Antibody<br>( $\alpha$ -Hu) | Host<br>Species | Source               | Code        | Dilution |        |
|                             |                 |                      |             | WB       | IF     |
| $\alpha$ - $\beta$ -actin   | mouse           | Proteintech          | 66009-1-IG  | 1:10000  | 1:100  |
| $\alpha$ -CHMP4B            | rabbit          | Proteintech          | 13683-1-AP  | 1:1000   | 1:200  |
| $\alpha$ -CHMP7             | mouse           | Santa Cruz           | SC-271805   | 1:1000   | 1:250  |
| $\alpha$ -CHMP7             | rabbit          | Proteintech          | 16424-1-AP  | 1:1000   | 1:200  |
| $\alpha$ -cGAS              | rabbit          | Cell Signalling Tech | 15102       | X        | 1:200  |
| $\alpha$ -CREST             | human           | Antibodies Inc       | 15-234-0001 | X        | 1:50   |
| $\alpha$ -GADPH             | mouse           | Santa Cruz           | SC-32233    | 1:1000   | X      |
| $\alpha$ - $\gamma$ H2AX    | mouse           | Abcam                | ab11174     | X        | 1:1000 |
| $\alpha$ - $\gamma$ H2AX    | rabbit          | Cell Signalling Tech | 9718        | X        | 1:400  |
| $\alpha$ -Lamin A/C         | goat            | Santa Cruz           | SC-6215     | X        | 1:500  |
| $\alpha$ -Lamin B1          | rabbit          | Proteintech          | 12987-1-AP  | X        | 1:300  |
| $\alpha$ -LAP2              | rabbit          | Proteintech          | 14651-1-AP  | X        | 1:300  |
| $\alpha$ -PARP1             | mouse           | Calbiochem           | AM30        | X        | 1:500  |
| $\alpha$ -PDI               | rabbit          | Cell Signalling Tech | 2446        | X        | 1:500  |
| $\alpha$ -PML               | rabbit          | Abcam                | Ab53773     | X        | 1:200  |
| $\alpha$ -RAD51             | rabbit          | Santa Cruz           | SC-8349     | X        | 1:100  |
| $\alpha$ -RPA32             | rabbit          | Bethyl Labs          | A300-245A   | X        | 1:1000 |
| $\alpha$ -RPA34-20          | mouse           | Calbiochem           | NA19L       | X        | 1:200  |
| $\alpha$ -RPA70             | mouse           | Santa Cruz           | sc-48425-S  | X        | 1:200  |
| $\alpha$ -TAT1              | mouse           | *                    | *           | 1:100    | X      |
| $\alpha$ -VPS4B             | rabbit          | Proteintech          | 17673-1-AP  | 1:1000   | X      |

\* kind gift from Keith Gull, University of Oxford 1:100 of a hybridoma supernatant
